# Supplementary material for: Modeling the live-pig trade network in Georgia: Implications for disease prevention and control
Source: PLoS One. 2017 Jun 9;12(6):e0178904. doi: 10.1371/journal.pone.0178904 (PMC5466301; doi:10.1371/journal.pone.0178904)
Supplement: S3 Table — (XLSX) [file pone.0178904.s003.xlsx]

## Sheet: Transactions_PLOS
	origin	destination	pigtype	Npigs	month	Regorigin	Regdestination	dist
1	Abasha	Abasha	2	2	Apr	Samegrelo-Zemo Svaneti	Samegrelo-Zemo Svaneti	0
2	Abasha	Maidani	3	4	June	Samegrelo-Zemo Svaneti	Samegrelo-Zemo Svaneti	12.1922
3	Abasha	Maidani	1	9	May	Samegrelo-Zemo Svaneti	Samegrelo-Zemo Svaneti	12.1922
4	Abasha	Samikao	2	1	Oct	Samegrelo-Zemo Svaneti	Samegrelo-Zemo Svaneti	12.9034
5	Abastumani	Lelovani	3	2	Jan	Samtskhe-Javakheti	Samtskhe-Javakheti	9.68823
6	Abuli	Akhalkalaki	1	1	Feb	Samtskhe-Javakheti	Samtskhe-Javakheti	11.3193
7	Abuli	Akhalkalaki	2	2	March	Samtskhe-Javakheti	Samtskhe-Javakheti	11.3193
8	Abuli	Akhalkalaki	1	1	Feb	Samtskhe-Javakheti	Samtskhe-Javakheti	11.3193
9	Abuli	Akhalkalaki	3	7	March	Samtskhe-Javakheti	Samtskhe-Javakheti	11.3193
10	Adigeni	Adigeni	3	2	Oct	Samtskhe-Javakheti	Samtskhe-Javakheti	0
11	Adigeni	Adigeni	4	2	Jan	Samtskhe-Javakheti	Samtskhe-Javakheti	0
12	Adigeni	Adigeni	1	1	Sep	Samtskhe-Javakheti	Samtskhe-Javakheti	0
13	Adigeni	Adigeni	3	6	Apr	Samtskhe-Javakheti	Samtskhe-Javakheti	0
14	Adigeni	Adigeni	3	8	Sep	Samtskhe-Javakheti	Samtskhe-Javakheti	0
15	Adigeni	Adigeni	3	4	May	Samtskhe-Javakheti	Samtskhe-Javakheti	0
16	Adigeni	Adigeni	3	3	June	Samtskhe-Javakheti	Samtskhe-Javakheti	0
17	Adigeni	Chorchani	3	4	Apr	Samtskhe-Javakheti	Samtskhe-Javakheti	3.57702
18	Adigeni	Chorchani	1	1	March	Samtskhe-Javakheti	Samtskhe-Javakheti	3.57702
19	Adigeni	Gorguli	1	1	March	Samtskhe-Javakheti	Samtskhe-Javakheti	1.45136
20	Adigeni	Imertubani	2	2	Feb	Samtskhe-Javakheti	Samtskhe-Javakheti	2.14361
21	Adigeni	Uraveli	1	2	Feb	Samtskhe-Javakheti	Samtskhe-Javakheti	34.7637
22	Adzvi	Adzvi	3	8	Oct	Shida Kartli	Shida Kartli	0
23	Adzvi	Gori	1	2	Nov	Shida Kartli	Shida Kartli	19.8641
24	Adzvi	Mejvriskhevi	1	2	Dec	Shida Kartli	Shida Kartli	2.69031
25	Agatani	Adzvi	3	3	May	Shida Kartli	Shida Kartli	38.5091
26	Akhaldaba	Akhaldaba	2	2	Nov	Samtskhe-Javakheti	Samtskhe-Javakheti	0
27	Akhaldaba	Akhaldaba	1	1	Sep	Samtskhe-Javakheti	Samtskhe-Javakheti	0
28	Akhaldaba	Akhaldaba	2	1	Sep	Samtskhe-Javakheti	Samtskhe-Javakheti	0
29	Akhaldaba	Khashuri	4	1	July	Samtskhe-Javakheti	Shida Kartli	11.9599
30	Akhalkalaki	Abuli	2	1	May	Samtskhe-Javakheti	Samtskhe-Javakheti	11.3193
31	Akhalkalaki	Abuli	1	1	March	Samtskhe-Javakheti	Samtskhe-Javakheti	11.3193
32	Akhalkalaki	Abuli	2	1	March	Samtskhe-Javakheti	Samtskhe-Javakheti	11.3193
33	Akhalkalaki	Aspindza	2	1	May	Samtskhe-Javakheti	Samtskhe-Javakheti	26.3488
34	Akhalkalaki	Aspindza	3	4	May	Samtskhe-Javakheti	Samtskhe-Javakheti	26.3488
35	Akhalkalaki	Aspindza	4	4	May	Samtskhe-Javakheti	Samtskhe-Javakheti	26.3488
36	Akhalkalaki	Aspindza	4	3	Apr	Samtskhe-Javakheti	Samtskhe-Javakheti	26.3488
37	Akhalkalaki	Bezhano	1	2	Feb	Samtskhe-Javakheti	Samtskhe-Javakheti	23.1439
38	Akhalkalaki	Bezhano	3	2	Feb	Samtskhe-Javakheti	Samtskhe-Javakheti	23.1439
39	Akhalkalaki	Damala	3	2	Sep	Samtskhe-Javakheti	Samtskhe-Javakheti	24.8993
40	Akhalkalaki	Khaveti	2	2	Feb	Samtskhe-Javakheti	Samtskhe-Javakheti	23.8066
41	Akhalkalaki	Khaveti	1	2	Feb	Samtskhe-Javakheti	Samtskhe-Javakheti	23.8066
42	Akhalkalaki	Khaveti	3	2	Feb	Samtskhe-Javakheti	Samtskhe-Javakheti	23.8066
43	Akhalkalaki	Khaveti	4	2	Feb	Samtskhe-Javakheti	Samtskhe-Javakheti	23.8066
44	Akhalkalaki	Khaveti	3	2	Feb	Samtskhe-Javakheti	Samtskhe-Javakheti	23.8066
45	Akhalkalaki	Khertvisi	4	1	Sep	Samtskhe-Javakheti	Samtskhe-Javakheti	18.0289
46	Akhalkalaki	Khospio	2	2	March	Samtskhe-Javakheti	Samtskhe-Javakheti	4.51798
47	Akhalkalaki	Kotelia	3	2	May	Samtskhe-Javakheti	Samtskhe-Javakheti	14.3821
48	Akhalkalaki	Kurozakan	2	2	Apr	Samtskhe-Javakheti	Samtskhe-Javakheti	6.06412
49	Akhalkalaki	Kvibisi	1	1	Nov	Samtskhe-Javakheti	Samtskhe-Javakheti	50.603
50	Akhalkalaki	Kvibisi	2	1	Nov	Samtskhe-Javakheti	Samtskhe-Javakheti	50.603
51	Akhalkalaki	Nijgori	4	2	March	Samtskhe-Javakheti	Samtskhe-Javakheti	21.0024
52	Akhalkalaki	Orgora	3	3	March	Samtskhe-Javakheti	Samtskhe-Javakheti	30.9598
53	Akhalkalaki	Samukhe	1	1	Apr	Samtskhe-Javakheti	Samtskhe-Javakheti	13.8783
54	Akhalkalaki	Tsnisi	3	2	Apr	Samtskhe-Javakheti	Samtskhe-Javakheti	44.8967
55	Akhalkalaki	Tsnisi	3	2	May	Samtskhe-Javakheti	Samtskhe-Javakheti	44.8967
56	Akhalkalaki	Vachian	2	1	March	Samtskhe-Javakheti	Samtskhe-Javakheti	6.73605
57	Akhalkalaki	Vachian	2	3	Feb	Samtskhe-Javakheti	Samtskhe-Javakheti	6.73605
58	Akhalkalaki	Vachian	2	2	Jan	Samtskhe-Javakheti	Samtskhe-Javakheti	6.73605
59	Akhalkalaki	Vachian	3	4	Feb	Samtskhe-Javakheti	Samtskhe-Javakheti	6.73605
60	Akhalkalaki	Vachian	2	1	Feb	Samtskhe-Javakheti	Samtskhe-Javakheti	6.73605
61	Akhalkalaki	Vachian	3	2	Jan	Samtskhe-Javakheti	Samtskhe-Javakheti	6.73605
62	Akhalkalaki	Vachian	3	2	Feb	Samtskhe-Javakheti	Samtskhe-Javakheti	6.73605
63	Akhalsheni	Khashuri	1	1	July	Shida Kartli	Shida Kartli	29.4151
64	Akhalsheni	Khashuri	1	3	Aug	Shida Kartli	Shida Kartli	29.4151
65	Akhalsheni	Tsromi	3	6	March	Shida Kartli	Shida Kartli	26.0294
66	Akhalsopeli	Akhalsopeli	1	10	March	Shida Kartli	Shida Kartli	0
67	Akhalsopeli	Gori	3	8	May	Shida Kartli	Shida Kartli	20.4017
68	Akhalsopeli	Gori	3	20	Dec	Shida Kartli	Shida Kartli	20.4017
69	Akhalsopeli	Gori	3	20	May	Shida Kartli	Shida Kartli	20.4017
70	Akhalsopeli	Zugdidi	1	1	Sep	Shida Kartli	Samegrelo-Zemo Svaneti	200.857
71	Akhaltsikhe	Adigeni	3	2	May	Samtskhe-Javakheti	Samtskhe-Javakheti	23.7123
72	Akhaltsikhe	Andriatsminda	3	2	May	Samtskhe-Javakheti	Samtskhe-Javakheti	8.60809
73	Akhaltsikhe	Kheoti	3	2	March	Samtskhe-Javakheti	Samtskhe-Javakheti	14.214
74	Akhaltsikhe	Kheoti	3	2	May	Samtskhe-Javakheti	Samtskhe-Javakheti	14.214
75	Akhaltsikhe	Kheoti	3	1	March	Samtskhe-Javakheti	Samtskhe-Javakheti	14.214
76	Akhaltsikhe	Kheoti	3	2	March	Samtskhe-Javakheti	Samtskhe-Javakheti	14.214
77	Akhaltsikhe	Kheoti	3	2	Feb	Samtskhe-Javakheti	Samtskhe-Javakheti	14.214
78	Akhaltsikhe	Khertvisi	3	13	Sep	Samtskhe-Javakheti	Samtskhe-Javakheti	30.8319
79	Akhaltsikhe	Lelovani	4	2	Apr	Samtskhe-Javakheti	Samtskhe-Javakheti	20.2682
80	Akhaltsikhe	Niala	4	3	Feb	Samtskhe-Javakheti	Samtskhe-Javakheti	34.4302
81	Akhaltsikhe	Oshora	3	1	Nov	Samtskhe-Javakheti	Samtskhe-Javakheti	21.3648
82	Akhaltsikhe	Oshora	3	2	May	Samtskhe-Javakheti	Samtskhe-Javakheti	21.3648
83	Akhaltsikhe	Tsnisi	2	2	May	Samtskhe-Javakheti	Samtskhe-Javakheti	8.27705
84	Akhaltsikhe	Tsnisi	3	3	March	Samtskhe-Javakheti	Samtskhe-Javakheti	8.27705
85	Akhaltsikhe	Uraveli	1	2	Apr	Samtskhe-Javakheti	Samtskhe-Javakheti	12.7622
86	Akhaltsikhe	Uraveli	3	4	Nov	Samtskhe-Javakheti	Samtskhe-Javakheti	12.7622
87	Akhaltsikhe	Uraveli	2	2	March	Samtskhe-Javakheti	Samtskhe-Javakheti	12.7622
88	Akhaltsikhe	Uraveli	2	2	May	Samtskhe-Javakheti	Samtskhe-Javakheti	12.7622
89	Akhmeta	Alvani	4	5	Feb	Kakheti	Kakheti	9.9501
90	Akhmeta	Alvani	1	1	Aug	Kakheti	Kakheti	9.9501
91	Akhmeta	Alvani	2	1	Aug	Kakheti	Kakheti	9.9501
92	Akhmeta	Odjio	2	1	Jan	Kakheti	Kakheti	14.4847
93	Akura	Akura	3	3	May	Kakheti	Kakheti	0
94	Akura	Nasamkhrali	3	4	March	Kakheti	Kakheti	9.09344
95	Akura	Nasamkhrali	3	3	March	Kakheti	Kakheti	9.09344
96	Akura	Telavi	1	7	May	Kakheti	Kakheti	13.457
97	Alvani	Akhmeta	1	3	Aug	Kakheti	Kakheti	9.9501
98	Anaga	Anaga	1	1	March	Kakheti	Kakheti	0
99	Anaga	Anaga	3	7	June	Kakheti	Kakheti	0
100	Apeni	Apeni	4	2	March	Kakheti	Kakheti	0
101	Apeni	Apeni	4	2	June	Kakheti	Kakheti	0
102	Apeni	Apeni	4	2	May	Kakheti	Kakheti	0
103	Apeni	Apeni	3	2	May	Kakheti	Kakheti	0
104	Apeni	Apeni	1	2	Oct	Kakheti	Kakheti	0
105	Apeni	Podaani	3	2	Feb	Kakheti	Kakheti	2.44128
106	Apeni	Podaani	3	1	Jan	Kakheti	Kakheti	2.44128
107	Apeni	Podaani	3	3	May	Kakheti	Kakheti	2.44128
108	Apeni	Podaani	3	2	Sep	Kakheti	Kakheti	2.44128
109	Apeni	Podaani	3	2	June	Kakheti	Kakheti	2.44128
110	Aspindza	Akhalkalaki	3	7	Feb	Samtskhe-Javakheti	Samtskhe-Javakheti	26.3488
111	Aspindza	Akhaltsikhe	2	5	Apr	Samtskhe-Javakheti	Samtskhe-Javakheti	23.9202
112	Aspindza	Aspindza	1	1	March	Samtskhe-Javakheti	Samtskhe-Javakheti	0
113	Aspindza	Aspindza	3	2	March	Samtskhe-Javakheti	Samtskhe-Javakheti	0
114	Aspindza	Aspindza	1	1	March	Samtskhe-Javakheti	Samtskhe-Javakheti	0
115	Aspindza	Aspindza	3	3	Sep	Samtskhe-Javakheti	Samtskhe-Javakheti	0
116	Aspindza	Aspindza	3	4	May	Samtskhe-Javakheti	Samtskhe-Javakheti	0
117	Aspindza	Aspindza	2	2	May	Samtskhe-Javakheti	Samtskhe-Javakheti	0
118	Aspindza	Aspindza	2	2	May	Samtskhe-Javakheti	Samtskhe-Javakheti	0
119	Aspindza	Aspindza	4	2	May	Samtskhe-Javakheti	Samtskhe-Javakheti	0
120	Aspindza	Damala	1	2	Dec	Samtskhe-Javakheti	Samtskhe-Javakheti	3.46359
121	Aspindza	Telavi	3	2	June	Samtskhe-Javakheti	Kakheti	187.843
122	Badiauri	Badiauri	4	3	June	Kakheti	Kakheti	0
123	Badiauri	Badiauri	1	2	Dec	Kakheti	Kakheti	0
124	Badiauri	Badiauri	1	7	Dec	Kakheti	Kakheti	0
125	Badiauri	Badiauri	3	10	May	Kakheti	Kakheti	0
126	Badiauri	Chailuri	3	30	Dec	Kakheti	Kakheti	8.53819
127	Badiauri	Chailuri	3	7	June	Kakheti	Kakheti	8.53819
128	Badiauri	Manavi	3	12	Oct	Kakheti	Kakheti	12.0967
129	Badiauri	Sagarejo	1	7	Aug	Kakheti	Kakheti	21.1939
130	Badiauri	Sagarejo	3	20	March	Kakheti	Kakheti	21.1939
131	Bebnisi	Bebnisi	2	1	March	Shida Kartli	Shida Kartli	0
132	Bebnisi	Bebnisi	1	2	Sep	Shida Kartli	Shida Kartli	0
133	Bebnisi	Bebnisi	4	2	Sep	Shida Kartli	Shida Kartli	0
134	Bebnisi	Kareli	1	2	May	Shida Kartli	Shida Kartli	1.66379
135	Bezhano	Akhalkalaki	2	3	March	Samtskhe-Javakheti	Samtskhe-Javakheti	23.1439
136	Bodbiskhevi	Anaga	3	4	March	Kakheti	Kakheti	7.11294
137	Bodbiskhevi	Anaga	3	1	Feb	Kakheti	Kakheti	7.11294
138	Bodbiskhevi	Bodbiskhevi	1	2	March	Kakheti	Kakheti	0
139	Bodbiskhevi	Kvemo_Magharo	3	3	Apr	Kakheti	Kakheti	9.29895
140	Bodbiskhevi	Kvemo_Magharo	3	15	Nov	Kakheti	Kakheti	9.29895
141	Bodbiskhevi	Tsnori	1	1	July	Kakheti	Kakheti	3.8161
142	Bodbiskhevi	Vakiri	1	3	Jan	Kakheti	Kakheti	4.03336
143	Bodbiskhevi	Vakiri	3	2	March	Kakheti	Kakheti	4.03336
144	Bodbiskhevi	Zemo_Bodbe	2	5	March	Kakheti	Kakheti	3.77229
145	Chailuri	Chailuri	2	2	Dec	Kakheti	Kakheti	0
146	Chailuri	Kachreti	3	30	June	Kakheti	Kakheti	13.4898
147	Chailuri	Kachreti	3	5	July	Kakheti	Kakheti	13.4898
148	Chkvaleti	Chkvaleti	1	2	Feb	Samegrelo-Zemo Svaneti	Samegrelo-Zemo Svaneti	0
149	Chorchani	Adigeni	3	7	Sep	Samtskhe-Javakheti	Samtskhe-Javakheti	3.57702
150	Chorchani	Chorchani	3	10	Sep	Samtskhe-Javakheti	Samtskhe-Javakheti	0
151	Chorchani	Chorchani	1	1	March	Samtskhe-Javakheti	Samtskhe-Javakheti	0
152	Dedoplistskaro	Dedoplistskaro	3	2	Dec	Kakheti	Kakheti	0
153	Dedoplistskaro	Dedoplistskaro	1	7	May	Kakheti	Kakheti	0
154	Dedoplistskaro	Dedoplistskaro	1	1	March	Kakheti	Kakheti	0
155	Dedoplistskaro	Dedoplistskaro	3	1	May	Kakheti	Kakheti	0
156	Dedoplistskaro	Japaridze	3	4	June	Kakheti	Kakheti	5.51784
157	Dedoplistskaro	Ozaani	2	1	Apr	Kakheti	Kakheti	13.1358
158	Dedoplistskaro	Samreklo	3	3	June	Kakheti	Kakheti	3.31701
159	Dedoplistskaro	Samreklo	3	5	May	Kakheti	Kakheti	3.31701
160	Dedoplistskaro	Samreklo	2	10	Apr	Kakheti	Kakheti	3.31701
161	Dedoplistskaro	Shibliani	4	6	May	Kakheti	Kakheti	46.5431
162	Dedoplistskaro	Shibliani	3	8	June	Kakheti	Kakheti	46.5431
163	Dedoplistskaro	Vakiri	1	4	March	Kakheti	Kakheti	23.2674
164	Dedoplistskaro	Vakiri	2	3	March	Kakheti	Kakheti	23.2674
165	Dedoplistskaro	Vakiri	3	3	March	Kakheti	Kakheti	23.2674
166	Dedoplistskaro	Vakiri	4	3	March	Kakheti	Kakheti	23.2674
167	Factory Settlement	Gori	3	6	Dec	Shida Kartli	Shida Kartli	2.25104
168	Factory Settlement	Gori	3	12	Dec	Shida Kartli	Shida Kartli	2.25104
169	Factory Settlement	Gori	3	10	May	Shida Kartli	Shida Kartli	2.25104
170	Factory Settlement	Mejvriskhevi	3	8	May	Shida Kartli	Shida Kartli	17.399
171	Gamarjveba	Dedoplistskaro	1	3	Sep	Kakheti	Kakheti	10.1662
172	Gamarjveba	Dedoplistskaro	3	6	June	Kakheti	Kakheti	10.1662
173	Gamarjveba	Dedoplistskaro	3	15	March	Kakheti	Kakheti	10.1662
174	Gamarjveba	Gamarjveba	2	1	Feb	Kakheti	Kakheti	0
175	Gamarjveba	Gamarjveba	1	6	Aug	Kakheti	Kakheti	0
176	Gamarjveba	Gamarjveba	4	2	Sep	Kakheti	Kakheti	0
177	Gamarjveba	Gamarjveba	3	2	Oct	Kakheti	Kakheti	0
178	Gamarjveba	Gamarjveba	1	7	Aug	Kakheti	Kakheti	0
179	Gamarjveba	Kheoti	3	2	Dec	Kakheti	Samtskhe-Javakheti	240.164
180	Gandza	Ninotsminda	3	9	March	Samtskhe-Javakheti	Samtskhe-Javakheti	16.4911
181	Gandza	Ninotsminda	3	6	Sep	Samtskhe-Javakheti	Samtskhe-Javakheti	16.4911
182	Gezati	Guzati	2	1	May	Samegrelo-Zemo Svaneti	Samegrelo-Zemo Svaneti	0
183	Ghvishi	Ghvishi	3	4	Feb	Samegrelo-Zemo Svaneti	Samegrelo-Zemo Svaneti	0
184	Ghvishi	Ghvishi	3	2	Dec	Samegrelo-Zemo Svaneti	Samegrelo-Zemo Svaneti	0
185	Gorelovka	Ninotsminda	3	5	Apr	Samtskhe-Javakheti	Samtskhe-Javakheti	9.92635
186	Gorelovka	Ninotsminda	3	2	Aug	Samtskhe-Javakheti	Samtskhe-Javakheti	9.92635
187	Gorelovka	Ninotsminda	3	14	Sep	Samtskhe-Javakheti	Samtskhe-Javakheti	9.92635
188	Gorguli	Adigeni	3	4	July	Samtskhe-Javakheti	Samtskhe-Javakheti	1.45136
189	Gorguli	Adigeni	3	8	May	Samtskhe-Javakheti	Samtskhe-Javakheti	1.45136
190	Gorguli	Adigeni	4	1	Sep	Samtskhe-Javakheti	Samtskhe-Javakheti	1.45136
191	Gori	Sakasheti	3	4	March	Shida Kartli	Shida Kartli	17.7658
192	Gujareti	Vardigeni	1	1	June	Samtskhe-Javakheti	Samtskhe-Javakheti	23.4528
193	Gurjaani	Kardenakhi	3	2	March	Kakheti	Kakheti	9.00336
194	Imerliantkari	Khashuri	3	16	Sep	Shida Kartli	Shida Kartli	12.3937
195	Imertubani	Adigeni	3	4	Aug	Samtskhe-Javakheti	Samtskhe-Javakheti	2.14361
196	Imertubani	Adigeni	3	4	Jan	Samtskhe-Javakheti	Samtskhe-Javakheti	2.14361
197	Imertubani	Adigeni	1	1	May	Samtskhe-Javakheti	Samtskhe-Javakheti	2.14361
198	Imertubani	Adigeni	3	15	Aug	Samtskhe-Javakheti	Samtskhe-Javakheti	2.14361
199	Imertubani	Imertubani	1	1	Jan	Samtskhe-Javakheti	Samtskhe-Javakheti	0
200	Imertubani	Imertubani	3	4	Aug	Samtskhe-Javakheti	Samtskhe-Javakheti	0
201	Jariasheni	Jariasheni	3	20	March	Shida Kartli	Shida Kartli	0
202	Jariasheni	Mejvriskhevi	3	20	Apr	Shida Kartli	Shida Kartli	4.03072
203	Jugaani	Tsnori	1	1	Sep	Kakheti	Kakheti	3.30408
204	Jvari	Jvari	3	2	May	Samegrelo-Zemo Svaneti	Samegrelo-Zemo Svaneti	0
205	Kabali	Anaga	1	1	Apr	Kakheti	Kakheti	27.3708
206	Kabali	Badiauri	3	5	Apr	Kakheti	Kakheti	52.4834
207	Kabali	Mzisguli	3	3	May	Kakheti	Kakheti	50.0097
208	Kakabeti	Chailuri	2	12	Dec	Kakheti	Kakheti	3.64018
209	Kardenakhi	Gurjaani	1	2	Apr	Kakheti	Kakheti	9.00336
210	Kareli	Bebnisi	2	2	March	Shida Kartli	Shida Kartli	1.66379
211	Kareli	Bebnisi	2	2	Sep	Shida Kartli	Shida Kartli	1.66379
212	Kareli	Kareli	2	2	June	Shida Kartli	Shida Kartli	0
213	Kareli	Kareli	2	4	Sep	Shida Kartli	Shida Kartli	0
214	Kareli	Kareli	2	2	March	Shida Kartli	Shida Kartli	0
215	Kareli	Kareli	3	3	March	Shida Kartli	Shida Kartli	0
216	Kareli	Kareli	3	2	Apr	Shida Kartli	Shida Kartli	0
217	Kareli	Kareli	3	3	Sep	Shida Kartli	Shida Kartli	0
218	Kareli	Kareli	2	2	Nov	Shida Kartli	Shida Kartli	0
219	Kareli	Kareli	1	30	May	Shida Kartli	Shida Kartli	0
220	Kareli	Kareli	2	4	Aug	Shida Kartli	Shida Kartli	0
221	Kareli	Kareli	4	2	Sep	Shida Kartli	Shida Kartli	0
222	Kareli	Kareli	2	4	Sep	Shida Kartli	Shida Kartli	0
223	Kareli	Kareli	2	2	Oct	Shida Kartli	Shida Kartli	0
224	Kareli	Kareli	1	3	Dec	Shida Kartli	Shida Kartli	0
225	Kareli	Kareli	1	2	Dec	Shida Kartli	Shida Kartli	0
226	Kareli	Kareli	1	3	Apr	Shida Kartli	Shida Kartli	0
227	Kareli	Kareli	1	2	Sep	Shida Kartli	Shida Kartli	0
228	Kareli	Kareli	3	5	Feb	Shida Kartli	Shida Kartli	0
229	Kareli	Kareli	1	4	Nov	Shida Kartli	Shida Kartli	0
230	Kareli	Kareli	3	4	July	Shida Kartli	Shida Kartli	0
231	Kareli	Kareli	3	4	July	Shida Kartli	Shida Kartli	0
232	Kareli	Kekhijvari	3	10	March	Shida Kartli	Shida Kartli	4.24392
233	Kareli	Maragi_Vani	1	4	June	Shida Kartli	Samtskhe-Javakheti	91.5843
234	Kareli	Maragi_Vani	2	1	June	Shida Kartli	Samtskhe-Javakheti	91.5843
235	Kareli	Maragi_Vani	3	10	June	Shida Kartli	Samtskhe-Javakheti	91.5843
236	Kekhijvari	Kekhijvari	2	2	Aug	Shida Kartli	Shida Kartli	0
237	Kekhijvari	Kekhijvari	2	2	March	Shida Kartli	Shida Kartli	0
238	Kekhijvari	Kekhijvari	1	2	Dec	Shida Kartli	Shida Kartli	0
239	Kekhijvari	Kekhijvari	4	2	Oct	Shida Kartli	Shida Kartli	0
240	Keleti	Khashuri	1	1	Sep	Shida Kartli	Shida Kartli	59.7786
241	Khasheme	Khabume	1	2	March	Samegrelo-Zemo Svaneti	Samegrelo-Zemo Svaneti	0
242	Khashuri	Imerliantkari	1	1	March	Shida Kartli	Shida Kartli	12.3937
243	Khashuri	Khashuri	3	6	March	Shida Kartli	Shida Kartli	0
244	Khashuri	Khashuri	1	1	May	Shida Kartli	Shida Kartli	0
245	Khashuri	Khashuri	1	3	Aug	Shida Kartli	Shida Kartli	0
246	Khashuri	Khashuri	1	6	Oct	Shida Kartli	Shida Kartli	0
247	Khashuri	Khashuri	1	6	Aug	Shida Kartli	Shida Kartli	0
248	Khashuri	Khashuri	1	4	Oct	Shida Kartli	Shida Kartli	0
249	Khashuri	Khtsisi	3	5	May	Shida Kartli	Shida Kartli	7.95721
250	Khashuri	Khtsisi	3	4	July	Shida Kartli	Shida Kartli	7.95721
251	Khashuri	Khtsisi	3	6	Aug	Shida Kartli	Shida Kartli	7.95721
252	Khashuri	Khtsisi	3	5	Apr	Shida Kartli	Shida Kartli	7.95721
253	Khashuri	Khtsisi	3	6	Aug	Shida Kartli	Shida Kartli	7.95721
254	Khashuri	Khtsisi	3	4	Aug	Shida Kartli	Shida Kartli	7.95721
255	Khashuri	Khtsisi	3	5	Apr	Shida Kartli	Shida Kartli	7.95721
256	Khashuri	Khtsisi	3	6	June	Shida Kartli	Shida Kartli	7.95721
257	Khashuri	Khtsisi	3	4	Aug	Shida Kartli	Shida Kartli	7.95721
258	Khashuri	Khtsisi	3	3	June	Shida Kartli	Shida Kartli	7.95721
259	Khashuri	Khtsisi	3	3	March	Shida Kartli	Shida Kartli	7.95721
260	Khashuri	Mghvrie_Tskali	3	5	March	Shida Kartli	Shida Kartli	8.27798
261	Khashuri	Plevi	3	16	March	Shida Kartli	Shida Kartli	12.329
262	Khashuri	Rveli	2	1	June	Shida Kartli	Samtskhe-Javakheti	19.6256
263	Khashuri	Tkoca	2	2	March	Shida Kartli	Shida Kartli	22.1999
264	Khashuri	Vardigeni	1	1	May	Shida Kartli	Samtskhe-Javakheti	23.2651
265	Khashuri	Vardigeni	2	1	May	Shida Kartli	Samtskhe-Javakheti	23.2651
266	Khashuri	Zanavi	2	1	March	Shida Kartli	Samtskhe-Javakheti	17.1368
267	Khaveti	Akhalkalaki	1	2	Aug	Samtskhe-Javakheti	Samtskhe-Javakheti	23.8066
268	Khaveti	Akhalkalaki	1	2	May	Samtskhe-Javakheti	Samtskhe-Javakheti	23.8066
269	Khaveti	Akhalkalaki	1	2	July	Samtskhe-Javakheti	Samtskhe-Javakheti	23.8066
270	Khaveti	Akhalkalaki	1	2	July	Samtskhe-Javakheti	Samtskhe-Javakheti	23.8066
271	Khaveti	Akhalkalaki	1	2	Apr	Samtskhe-Javakheti	Samtskhe-Javakheti	23.8066
272	Khertvisi	Aspindza	1	3	July	Samtskhe-Javakheti	Samtskhe-Javakheti	11.4928
273	Khibula	Zugdidi	3	7	Apr	Samegrelo-Zemo Svaneti	Samegrelo-Zemo Svaneti	7.45623
274	Khibula	Zugdidi	3	5	Apr	Samegrelo-Zemo Svaneti	Samegrelo-Zemo Svaneti	7.45623
275	Khibula	Zugdidi	3	11	May	Samegrelo-Zemo Svaneti	Samegrelo-Zemo Svaneti	7.45623
276	Khibula	Zugdidi	3	7	Apr	Samegrelo-Zemo Svaneti	Samegrelo-Zemo Svaneti	7.45623
277	Khibula	Zugdidi	3	5	March	Samegrelo-Zemo Svaneti	Samegrelo-Zemo Svaneti	7.45623
278	Khibula	Zugdidi	3	10	Apr	Samegrelo-Zemo Svaneti	Samegrelo-Zemo Svaneti	7.45623
279	Khibula	Zugdidi	3	6	May	Samegrelo-Zemo Svaneti	Samegrelo-Zemo Svaneti	7.45623
280	Khibula	Zugdidi	3	9	May	Samegrelo-Zemo Svaneti	Samegrelo-Zemo Svaneti	7.45623
281	Khibula	Zugdidi	3	8	May	Samegrelo-Zemo Svaneti	Samegrelo-Zemo Svaneti	7.45623
282	Khibula	Zugdidi	3	5	Apr	Samegrelo-Zemo Svaneti	Samegrelo-Zemo Svaneti	7.45623
283	Khibula	Zugdidi	3	7	May	Samegrelo-Zemo Svaneti	Samegrelo-Zemo Svaneti	7.45623
284	Khobi	Khibula	1	1	May	Samegrelo-Zemo Svaneti	Samegrelo-Zemo Svaneti	14.5037
285	Khobi	Sajijao	3	1	July	Samegrelo-Zemo Svaneti	Samegrelo-Zemo Svaneti	1.52896
286	Khodasheni	Kisiskhevi	3	3	Apr	Kakheti	Kakheti	6.08484
287	Khorga	Senaki	3	19	Apr	Samegrelo-Zemo Svaneti	Samegrelo-Zemo Svaneti	19.8082
288	Khorga	Senaki	3	21	May	Samegrelo-Zemo Svaneti	Samegrelo-Zemo Svaneti	19.8082
289	Khorkheli	Pshaveli	1	3	July	Kakheti	Kakheti	13.9422
290	Khospio	Akhalkalaki	1	2	Jan	Samtskhe-Javakheti	Samtskhe-Javakheti	4.51798
291	Khtsisi	Khashuri	1	5	Aug	Shida Kartli	Shida Kartli	7.95721
292	Khtsisi	Khashuri	1	4	June	Shida Kartli	Shida Kartli	7.95721
293	Khtsisi	Khashuri	1	3	June	Shida Kartli	Shida Kartli	7.95721
294	Khtsisi	Khashuri	1	5	Aug	Shida Kartli	Shida Kartli	7.95721
295	Khtsisi	Khashuri	1	6	Aug	Shida Kartli	Shida Kartli	7.95721
296	Khtsisi	Khashuri	1	2	Aug	Shida Kartli	Shida Kartli	7.95721
297	Khtsisi	Khashuri	1	5	Aug	Shida Kartli	Shida Kartli	7.95721
298	Khtsisi	Khashuri	1	4	June	Shida Kartli	Shida Kartli	7.95721
299	Khtsisi	Khashuri	1	6	Aug	Shida Kartli	Shida Kartli	7.95721
300	Martvili	Martvili	1	3	July	Samegrelo-Zemo Svaneti	Samegrelo-Zemo Svaneti	0
301	Khvedureti	Khvedureti	1	4	Jan	Shida Kartli	Shida Kartli	0
302	Khvedureti	Khvedureti	1	4	Dec	Shida Kartli	Shida Kartli	0
303	Kisiskhevi	Kisiskhevi	3	5	March	Kakheti	Kakheti	0
304	Klde	Kvabiskhevi	1	2	May	Samtskhe-Javakheti	Samtskhe-Javakheti	21.6224
305	Kotelia	Akhalkalaki	4	1	Dec	Samtskhe-Javakheti	Samtskhe-Javakheti	14.3821
306	Kriskhevi	Khashuri	1	4	Aug	Shida Kartli	Shida Kartli	5.05486
307	Kriskhevi	Khashuri	1	2	Aug	Shida Kartli	Shida Kartli	5.05486
308	Kriskhevi	Khashuri	1	3	Aug	Shida Kartli	Shida Kartli	5.05486
309	Kurozakan	Akhalkalaki	1	1	Aug	Samtskhe-Javakheti	Samtskhe-Javakheti	6.06412
310	Kvabiskhevi	Akhaltsikhe	3	12	March	Samtskhe-Javakheti	Samtskhe-Javakheti	27.4487
311	Kvabiskhevi	Borjomi	4	2	March	Samtskhe-Javakheti	Samtskhe-Javakheti	14.7662
312	Kvabiskhevi	Khashuri	4	1	July	Samtskhe-Javakheti	Shida Kartli	36.8305
313	Kvabiskhevi	Kvabiskhevi	3	2	March	Samtskhe-Javakheti	Samtskhe-Javakheti	0
314	Kvabiskhevi	Kvabiskhevi	1	1	July	Samtskhe-Javakheti	Samtskhe-Javakheti	0
315	Kvabiskhevi	Kvabiskhevi	2	1	Apr	Samtskhe-Javakheti	Samtskhe-Javakheti	0
316	Kvabiskhevi	Kvabiskhevi	2	1	July	Samtskhe-Javakheti	Samtskhe-Javakheti	0
317	Kvabiskhevi	Likani	1	1	June	Samtskhe-Javakheti	Samtskhe-Javakheti	10.5659
318	Kvabiskhevi	Likani	1	1	Aug	Samtskhe-Javakheti	Samtskhe-Javakheti	10.5659
319	Kvareli	Chikaani	1	1	May	Kakheti	Kakheti	10.7991
320	Kvareli	Kvareli	3	2	May	Kakheti	Kakheti	0
321	Kvareli	Kvareli	3	15	March	Kakheti	Kakheti	0
322	Kvareli	Kvareli	3	4	July	Kakheti	Kakheti	0
323	Kvareli	Kvareli	3	6	May	Kakheti	Kakheti	0
324	Kvareli	Kvareli	4	4	March	Kakheti	Kakheti	0
325	Kvareli	Kvareli	3	15	May	Kakheti	Kakheti	0
326	Kvareli	Kvareli	1	10	March	Kakheti	Kakheti	0
327	Kvareli	Kvareli	2	11	Apr	Kakheti	Kakheti	0
328	Kvareli	Kvareli	3	15	July	Kakheti	Kakheti	0
329	Kvareli	Kvareli	4	4	Oct	Kakheti	Kakheti	0
330	Kvareli	Sanavardo	3	10	Jan	Kakheti	Kakheti	4.86381
331	Kvareli	Sanavardo	1	6	March	Kakheti	Kakheti	4.86381
332	Kvareli	Sanavardo	1	1	Jan	Kakheti	Kakheti	4.86381
333	Kvareli	Sanavardo	3	4	Apr	Kakheti	Kakheti	4.86381
334	Kvareli	Sanavardo	3	5	Apr	Kakheti	Kakheti	4.86381
335	Kvarkheti	Kvarkheti	3	2	July	Shida Kartli	Shida Kartli	0
336	Kvarkheti	Kvarkheti	1	2	Dec	Shida Kartli	Shida Kartli	0
337	Kvarkheti	Kvarkheti	3	8	May	Shida Kartli	Shida Kartli	0
338	Kvarkheti	Kvarkheti	3	7	Sep	Shida Kartli	Shida Kartli	0
339	Kvarkheti	Mejvriskhevi	1	2	Dec	Shida Kartli	Shida Kartli	6.76279
340	Kvibisi	Khashuri	4	1	Aug	Samtskhe-Javakheti	Shida Kartli	20.5895
341	Kvibisi	Kvibisi	1	2	Oct	Samtskhe-Javakheti	Samtskhe-Javakheti	0
342	Kvibisi	Kvibisi	2	3	Oct	Samtskhe-Javakheti	Samtskhe-Javakheti	0
343	Kvibisi	Likani	1	1	Aug	Samtskhe-Javakheti	Samtskhe-Javakheti	5.93732
344	Kvishkheti	Khashuri	1	5	Aug	Shida Kartli	Shida Kartli	8.65944
345	Lagodekhi	Apeni	4	3	Dec	Kakheti	Kakheti	20.8178
346	Lagodekhi	Apeni	1	1	Feb	Kakheti	Kakheti	20.8178
347	Lagodekhi	Chailuri	3	10	June	Kakheti	Kakheti	65.006
348	Lagodekhi	Podaani	1	3	Nov	Kakheti	Kakheti	20.9555
349	Lagodekhi	Podaani	1	1	Jan	Kakheti	Kakheti	20.9555
350	Lagodekhi	Sanavardo	1	2	May	Kakheti	Kakheti	37.3174
351	Lagodekhi	Sanavardo	4	6	March	Kakheti	Kakheti	37.3174
352	Larebi	Kvabiskhevi	3	2	March	Samtskhe-Javakheti	Samtskhe-Javakheti	5.60807
353	Larebi	Kvabiskhevi	2	1	March	Samtskhe-Javakheti	Samtskhe-Javakheti	5.60807
354	Lelovani	Adigeni	1	1	Nov	Samtskhe-Javakheti	Samtskhe-Javakheti	4.17123
355	Lelovani	Akhaltsikhe	4	1	March	Samtskhe-Javakheti	Samtskhe-Javakheti	20.2682
356	Lelovani	Akhaltsikhe	4	1	May	Samtskhe-Javakheti	Samtskhe-Javakheti	20.2682
357	Lelovani	Lelovani	3	2	Feb	Samtskhe-Javakheti	Samtskhe-Javakheti	0
358	Lelovani	Lelovani	3	2	Jan	Samtskhe-Javakheti	Samtskhe-Javakheti	0
359	Lesichine	Lesichine	1	3	Aug	Samegrelo-Zemo Svaneti	Samegrelo-Zemo Svaneti	0
360	Maghrani	Maghrani	3	2	June	Kakheti	Kakheti	0
361	Maidani	Abasha	1	2	Dec	Samegrelo-Zemo Svaneti	Samegrelo-Zemo Svaneti	12.1922
362	Maidani	Maidani	4	2	Jan	Samegrelo-Zemo Svaneti	Samegrelo-Zemo Svaneti	0
363	Maidani	Maidani	1	1	Feb	Samegrelo-Zemo Svaneti	Samegrelo-Zemo Svaneti	0
364	Maidani	Maidani	3	3	Feb	Samegrelo-Zemo Svaneti	Samegrelo-Zemo Svaneti	0
365	Maidani	Maidani	1	2	July	Samegrelo-Zemo Svaneti	Samegrelo-Zemo Svaneti	0
366	Maidani	Maidani	2	7	March	Samegrelo-Zemo Svaneti	Samegrelo-Zemo Svaneti	0
367	Maragi_Vani	Aspindza	1	6	Aug	Samtskhe-Javakheti	Samtskhe-Javakheti	19.4454
368	Maragi_Vani	Aspindza	3	50	Nov	Samtskhe-Javakheti	Samtskhe-Javakheti	19.4454
369	Maragi_Vani	Aspindza	2	1	Dec	Samtskhe-Javakheti	Samtskhe-Javakheti	19.4454
370	Martvili	Martvili	3	5	Feb	Samegrelo-Zemo Svaneti	Samegrelo-Zemo Svaneti	0
371	Martvili	Martvili	2	8	Jan	Samegrelo-Zemo Svaneti	Samegrelo-Zemo Svaneti	0
372	Martvili	Martvili	3	4	Jan	Samegrelo-Zemo Svaneti	Samegrelo-Zemo Svaneti	0
373	Martvili	Najakhavo	1	1	March	Samegrelo-Zemo Svaneti	Samegrelo-Zemo Svaneti	9.4974
374	Martvili	Najakhavo	3	8	Feb	Samegrelo-Zemo Svaneti	Samegrelo-Zemo Svaneti	9.4974
375	Martvili	Najakhavo	3	2	March	Samegrelo-Zemo Svaneti	Samegrelo-Zemo Svaneti	9.4974
376	Martvili	Sergieti	4	6	May	Samegrelo-Zemo Svaneti	Samegrelo-Zemo Svaneti	2.54454
377	Matani	Akhmeta	3	40	May	Kakheti	Kakheti	5.21731
378	Matani	Akhmeta	1	3	May	Kakheti	Kakheti	5.21731
379	Matani	Matani	3	20	Sep	Kakheti	Kakheti	0
380	Matani	Matani	3	20	Aug	Kakheti	Kakheti	0
381	Mejvriskhevi	Mejvriskhevi	1	1	Sep	Shida Kartli	Shida Kartli	0
382	Mejvriskhevi	Mejvriskhevi	1	3	Nov	Shida Kartli	Shida Kartli	0
383	Mejvriskhevi	Mejvriskhevi	3	20	March	Shida Kartli	Shida Kartli	0
384	Mejvriskhevi	Mejvriskhevi	1	2	Dec	Shida Kartli	Shida Kartli	0
385	Mejvriskhevi	Mejvriskhevi	3	10	Jan	Shida Kartli	Shida Kartli	0
386	Mejvriskhevi	Mejvriskhevi	1	3	Dec	Shida Kartli	Shida Kartli	0
387	Mghvrie_Tskali	Khashuri	1	5	Aug	Shida Kartli	Shida Kartli	8.27798
388	Mitsobi	Khashuri	1	3	Aug	Shida Kartli	Shida Kartli	68.2066
389	Mitsobi	Khashuri	3	30	Oct	Shida Kartli	Shida Kartli	68.2066
390	Mitsobi	Khashuri	1	1	Feb	Shida Kartli	Shida Kartli	68.2066
391	Mitsobi	Khashuri	1	4	Sep	Shida Kartli	Shida Kartli	68.2066
392	Mitsobi	Khashuri	1	1	March	Shida Kartli	Shida Kartli	68.2066
393	Mitsobi	Khashuri	1	1	Aug	Shida Kartli	Shida Kartli	68.2066
394	Mitsobi	Khashuri	1	2	Sep	Shida Kartli	Shida Kartli	68.2066
395	Mumlaantkari	Mejvriskhevi	3	6	May	Shida Kartli	Shida Kartli	24.3831
396	Mumlaantkari	Mejvriskhevi	3	5	Feb	Shida Kartli	Shida Kartli	24.3831
397	Mumlaantkari	Mejvriskhevi	1	2	Dec	Shida Kartli	Shida Kartli	24.3831
398	Mumlaantkari	Mejvriskhevi	1	2	Nov	Shida Kartli	Shida Kartli	24.3831
399	Mumlaantkari	Mejvriskhevi	1	2	Dec	Shida Kartli	Shida Kartli	24.3831
400	Mumlaantkari	Mumlaantkari	3	10	Apr	Shida Kartli	Shida Kartli	0
401	Mzisguli	Gurjaani	1	2	Sep	Kakheti	Kakheti	20.4193
402	Mzisguli	Gurjaani	1	18	Dec	Kakheti	Kakheti	20.4193
403	Najakhavo	Martvili	1	1	Aug	Samegrelo-Zemo Svaneti	Samegrelo-Zemo Svaneti	9.4974
404	Najakhavo	Martvili	1	1	Apr	Samegrelo-Zemo Svaneti	Samegrelo-Zemo Svaneti	9.4974
405	Niala	Aspindza	1	5	May	Samtskhe-Javakheti	Samtskhe-Javakheti	25.4141
406	Nijgori	Atskvita	3	2	Nov	Samtskhe-Javakheti	Samtskhe-Javakheti	0.825317
407	Ninotsminda	Gandza	3	1	May	Samtskhe-Javakheti	Samtskhe-Javakheti	16.4911
408	Ninotsminda	Gorelovka	1	3	Sep	Samtskhe-Javakheti	Samtskhe-Javakheti	9.92635
409	Ninotsminda	Gorelovka	1	1	Feb	Samtskhe-Javakheti	Samtskhe-Javakheti	9.92635
410	Ninotsminda	Ninotsminda	2	3	Feb	Samtskhe-Javakheti	Samtskhe-Javakheti	0
411	Ninotsminda	Ninotsminda	3	4	March	Samtskhe-Javakheti	Samtskhe-Javakheti	0
412	Ninotsminda	Ninotsminda	1	1	March	Samtskhe-Javakheti	Samtskhe-Javakheti	0
413	Ninotsminda	Ninotsminda	1	6	Oct	Samtskhe-Javakheti	Samtskhe-Javakheti	0
414	Ninotsminda	Ninotsminda	3	5	Sep	Samtskhe-Javakheti	Samtskhe-Javakheti	0
415	Ninotsminda	Ninotsminda	1	4	Sep	Samtskhe-Javakheti	Samtskhe-Javakheti	0
416	Ninotsminda	Ninotsminda	3	5	Oct	Samtskhe-Javakheti	Samtskhe-Javakheti	0
417	Ninotsminda	Ninotsminda	3	4	Nov	Samtskhe-Javakheti	Samtskhe-Javakheti	0
418	Ninotsminda	Ninotsminda	1	2	March	Samtskhe-Javakheti	Samtskhe-Javakheti	0
419	Ninotsminda	Poga	1	1	March	Samtskhe-Javakheti	Samtskhe-Javakheti	29.0954
420	Nojikhevi	Senaki	3	7	March	Samegrelo-Zemo Svaneti	Samegrelo-Zemo Svaneti	23.702
421	Nojikhevi	Senaki	3	5	Apr	Samegrelo-Zemo Svaneti	Samegrelo-Zemo Svaneti	23.702
422	Odjio	Telavi	3	75	Dec	Kakheti	Kakheti	11.6857
423	Orgora	Aspindza	4	2	Dec	Samtskhe-Javakheti	Samtskhe-Javakheti	6.10726
424	Orgora	Aspindza	1	1	May	Samtskhe-Javakheti	Samtskhe-Javakheti	6.10726
425	Orgora	Orgora	3	3	Oct	Samtskhe-Javakheti	Samtskhe-Javakheti	0
426	Oshora	Akhaltsikhe	3	20	May	Samtskhe-Javakheti	Samtskhe-Javakheti	21.3648
427	Oshora	Akhaltsikhe	3	20	Oct	Samtskhe-Javakheti	Samtskhe-Javakheti	21.3648
428	Oshora	Aspindza	3	2	July	Samtskhe-Javakheti	Samtskhe-Javakheti	4.42826
429	Oshora	Oshora	4	2	Apr	Samtskhe-Javakheti	Samtskhe-Javakheti	0
430	Oshora	Oshora	4	2	March	Samtskhe-Javakheti	Samtskhe-Javakheti	0
431	Ozaani	Dedoplistskaro	3	4	Dec	Kakheti	Kakheti	13.1358
432	Phakhulani	Phakhulani	1	2	Jan	Samegrelo-Zemo Svaneti	Samegrelo-Zemo Svaneti	0
433	Pkhvenisi	Pkhvenisi	3	8	Apr	Shida Kartli	Shida Kartli	0
434	Pkhvenisi	Pkhvenisi	3	10	Dec	Shida Kartli	Shida Kartli	0
435	Pkhvenisi	Pkhvenisi	1	2	Dec	Shida Kartli	Shida Kartli	0
436	Pkhvenisi	Pkhvenisi	2	2	Apr	Shida Kartli	Shida Kartli	0
437	Plevi	Khashuri	3	16	Aug	Shida Kartli	Shida Kartli	12.329
438	Plevi	Plevi	1	2	March	Shida Kartli	Shida Kartli	0
439	Plevi	Plevi	2	6	July	Shida Kartli	Shida Kartli	0
440	Plevi	Tkoca	3	3	March	Shida Kartli	Shida Kartli	13.6118
441	Podaani	Lagodekhi	3	6	Oct	Kakheti	Kakheti	20.9555
442	Podaani	Podaani	3	5	Apr	Kakheti	Kakheti	0
443	Podaani	Zemo_Nashovari	3	1	Sep	Kakheti	Samegrelo-Zemo Svaneti	309.351
444	Poga	Ninotsminda	2	1	Sep	Samtskhe-Javakheti	Samtskhe-Javakheti	29.0954
445	Potskho	Potskho	3	4	March	Samegrelo-Zemo Svaneti	Samegrelo-Zemo Svaneti	0
446	Potskho	Potskho	3	1	May	Samegrelo-Zemo Svaneti	Samegrelo-Zemo Svaneti	0
447	Rustavi	Kvabiskhevi	1	1	Apr	Samtskhe-Javakheti	Samtskhe-Javakheti	19.1504
448	Rveli	Khashuri	3	30	Apr	Samtskhe-Javakheti	Shida Kartli	19.6256
449	Rveli	Vardigeni	2	1	June	Samtskhe-Javakheti	Samtskhe-Javakheti	7.04552
450	Rveli	Vardigeni	2	2	May	Samtskhe-Javakheti	Samtskhe-Javakheti	7.04552
451	Sagarejo	Kakabeti	3	15	March	Kakheti	Kakheti	17.9787
452	Sagvichio	Senaki	3	5	March	Samegrelo-Zemo Svaneti	Samegrelo-Zemo Svaneti	18.5631
453	Sagvichio	Senaki	3	7	Apr	Samegrelo-Zemo Svaneti	Samegrelo-Zemo Svaneti	18.5631
454	Sagvichio	Senaki	3	6	June	Samegrelo-Zemo Svaneti	Samegrelo-Zemo Svaneti	18.5631
455	Sakasheti	Gori	4	4	Dec	Shida Kartli	Shida Kartli	17.7658
456	Sakasheti	Sakasheti	2	2	March	Shida Kartli	Shida Kartli	0
457	Sakasheti	Sakasheti	1	2	Dec	Shida Kartli	Shida Kartli	0
458	Sakhudabeli	Aspindza	4	3	May	Samtskhe-Javakheti	Samtskhe-Javakheti	0
459	Samikao	Maidani	3	4	Sep	Samegrelo-Zemo Svaneti	Samegrelo-Zemo Svaneti	0.713712
460	Samikao	Samikao	1	2	May	Samegrelo-Zemo Svaneti	Samegrelo-Zemo Svaneti	0
461	Samikao	Samikao	2	4	Dec	Samegrelo-Zemo Svaneti	Samegrelo-Zemo Svaneti	0
462	Samreklo	Dedoplistskaro	1	6	March	Kakheti	Kakheti	3.31701
463	Samreklo	Dedoplistskaro	1	4	Aug	Kakheti	Kakheti	3.31701
464	Samreklo	Dedoplistskaro	1	3	Aug	Kakheti	Kakheti	3.31701
465	Samreklo	Dedoplistskaro	1	10	May	Kakheti	Kakheti	3.31701
466	Samukhe	Akhalkalaki	1	2	May	Samtskhe-Javakheti	Samtskhe-Javakheti	13.8783
467	Samukhe	Akhalkalaki	2	3	Feb	Samtskhe-Javakheti	Samtskhe-Javakheti	13.8783
468	Sanavardo	Kvareli	3	6	Dec	Kakheti	Kakheti	4.86381
469	Sanavardo	Kvareli	2	2	March	Kakheti	Kakheti	4.86381
470	Sanavardo	Kvareli	3	4	July	Kakheti	Kakheti	4.86381
471	Sanavardo	Kvareli	4	3	Aug	Kakheti	Kakheti	4.86381
472	Sanavardo	Kvareli	3	10	Apr	Kakheti	Kakheti	4.86381
473	Sanavardo	Kvareli	3	1	July	Kakheti	Kakheti	4.86381
474	Sanavardo	Kvareli	3	10	May	Kakheti	Kakheti	4.86381
475	Sanavardo	Sanavardo	3	2	June	Kakheti	Kakheti	0
476	Sanavardo	Sanavardo	3	2	Oct	Kakheti	Kakheti	0
477	Sasireti	Sasireti	2	2	March	Shida Kartli	Shida Kartli	0
478	Sasireti	Sasireti	2	2	Dec	Shida Kartli	Shida Kartli	0
479	Senaki	Dzveli_Senaki	1	1	Apr	Samegrelo-Zemo Svaneti	Samegrelo-Zemo Svaneti	6.01183
480	Senaki	Senaki	3	1	Feb	Samegrelo-Zemo Svaneti	Samegrelo-Zemo Svaneti	0
481	Senaki	Senaki	3	2	Apr	Samegrelo-Zemo Svaneti	Samegrelo-Zemo Svaneti	0
482	Senaki	Senaki	3	2	Aug	Samegrelo-Zemo Svaneti	Samegrelo-Zemo Svaneti	0
483	Senaki	Senaki	3	2	March	Samegrelo-Zemo Svaneti	Samegrelo-Zemo Svaneti	0
484	Senaki	Senaki	3	1	Nov	Samegrelo-Zemo Svaneti	Samegrelo-Zemo Svaneti	0
485	Senaki	Senaki	3	1	Sep	Samegrelo-Zemo Svaneti	Samegrelo-Zemo Svaneti	0
486	Senaki	Senaki	3	4	Dec	Samegrelo-Zemo Svaneti	Samegrelo-Zemo Svaneti	0
487	Senaki	Teklati	3	1	Aug	Samegrelo-Zemo Svaneti	Samegrelo-Zemo Svaneti	3.93877
488	Senaki	Teklati	1	1	Oct	Samegrelo-Zemo Svaneti	Samegrelo-Zemo Svaneti	3.93877
489	Shibliani	Sagarejo	1	10	Oct	Kakheti	Kakheti	24.9275
490	Shibliani	Sagarejo	1	12	Dec	Kakheti	Kakheti	24.9275
491	Shibliani	Shibliani	1	3	May	Kakheti	Kakheti	0
492	Shibliani	Shibliani	3	3	Dec	Kakheti	Kakheti	0
493	Taia	Martvili	3	12	Apr	Samegrelo-Zemo Svaneti	Samegrelo-Zemo Svaneti	25.2228
494	Taia	Napichkhovo	3	3	Sep	Samegrelo-Zemo Svaneti	Samegrelo-Zemo Svaneti	3.02939
495	Taia	Taia	1	2	Jan	Samegrelo-Zemo Svaneti	Samegrelo-Zemo Svaneti	0
496	Taia	Taia	1	15	May	Samegrelo-Zemo Svaneti	Samegrelo-Zemo Svaneti	0
497	Taia	Taia	3	20	June	Samegrelo-Zemo Svaneti	Samegrelo-Zemo Svaneti	0
498	Teklati	Senaki	3	2	Apr	Samegrelo-Zemo Svaneti	Samegrelo-Zemo Svaneti	3.93877
499	Teklati	Senaki	3	3	Oct	Samegrelo-Zemo Svaneti	Samegrelo-Zemo Svaneti	3.93877
500	Teklati	Senaki	3	4	Aug	Samegrelo-Zemo Svaneti	Samegrelo-Zemo Svaneti	3.93877
501	Teklati	Teklati	3	2	Aug	Samegrelo-Zemo Svaneti	Samegrelo-Zemo Svaneti	0
502	Teklati	Teklati	3	1	Sep	Samegrelo-Zemo Svaneti	Samegrelo-Zemo Svaneti	0
503	Teklati	Teklati	3	1	Dec	Samegrelo-Zemo Svaneti	Samegrelo-Zemo Svaneti	0
504	Teklati	Zugdidi	3	2	Dec	Samegrelo-Zemo Svaneti	Samegrelo-Zemo Svaneti	30.7948
505	Tkhyubi	Tkviavi	3	6	Apr	Shida Kartli	Shida Kartli	0
506	Tkhyubi	Tkviavi	1	3	Dec	Shida Kartli	Shida Kartli	0
507	Tkhyubi	Tkviavi	1	3	Dec	Shida Kartli	Shida Kartli	0
508	Tkhyubi	Tkviavi	3	20	Dec	Shida Kartli	Shida Kartli	0
509	Tkoca	Tkoca	3	3	Jan	Shida Kartli	Shida Kartli	0
510	Tkoca	Tkoca	3	3	Sep	Shida Kartli	Shida Kartli	0
511	Tkoca	Tkoca	1	3	Sep	Shida Kartli	Shida Kartli	0
512	Tkoca	Tkoca	1	2	Sep	Shida Kartli	Shida Kartli	0
513	Tkviavi	Tkhyubi	3	4	March	Shida Kartli	Shida Kartli	0
514	Tsalenjikha	Jvari	1	2	Sep	Samegrelo-Zemo Svaneti	Samegrelo-Zemo Svaneti	12.3059
515	Tsalenjikha	Phakhulani	1	1	Feb	Samegrelo-Zemo Svaneti	Samegrelo-Zemo Svaneti	11.0335
516	Tsnisi	Akhaltsikhe	1	1	Dec	Samtskhe-Javakheti	Samtskhe-Javakheti	8.27705
517	Tsnisi	Akhaltsikhe	1	2	Nov	Samtskhe-Javakheti	Samtskhe-Javakheti	8.27705
518	Tsnisi	Akhaltsikhe	3	8	June	Samtskhe-Javakheti	Samtskhe-Javakheti	8.27705
519	Tsnisi	Akhaltsikhe	1	1	Nov	Samtskhe-Javakheti	Samtskhe-Javakheti	8.27705
520	Tsnisi	Akhaltsikhe	1	1	Dec	Samtskhe-Javakheti	Samtskhe-Javakheti	8.27705
521	Tsnori	Tsnori	1	2	Feb	Kakheti	Kakheti	0
522	Tsnori	Tsnori	4	1	Aug	Kakheti	Kakheti	0
523	Tsnori	Zemo_Bodbe	4	2	March	Kakheti	Kakheti	5.86621
524	Tsromi	Khashuri	1	4	Aug	Shida Kartli	Shida Kartli	12.0828
525	Tsromi	Khashuri	1	1	May	Shida Kartli	Shida Kartli	12.0828
526	Tsvirmi	Tsvirmi	3	1	Feb	Samegrelo-Zemo Svaneti	Samegrelo-Zemo Svaneti	0
527	Tsvirmi	Zugdidi	1	2	Aug	Samegrelo-Zemo Svaneti	Samegrelo-Zemo Svaneti	95.9422
528	Uraveli	Adigeni	3	17	UK	Samtskhe-Javakheti	Samtskhe-Javakheti	34.7637
529	Uraveli	Adigeni	4	2	UK	Samtskhe-Javakheti	Samtskhe-Javakheti	34.7637
530	Uraveli	Akhaltsikhe	3	15	May	Samtskhe-Javakheti	Samtskhe-Javakheti	12.7622
531	Uraveli	Akhaltsikhe	3	14	UK	Samtskhe-Javakheti	Samtskhe-Javakheti	12.7622
532	Uraveli	Akhaltsikhe	3	6	UK	Samtskhe-Javakheti	Samtskhe-Javakheti	12.7622
533	Uraveli	Akhaltsikhe	1	2	Apr	Samtskhe-Javakheti	Samtskhe-Javakheti	12.7622
534	Uraveli	Akhaltsikhe	3	10	Sep	Samtskhe-Javakheti	Samtskhe-Javakheti	12.7622
535	Uraveli	Akhaltsikhe	3	15	May	Samtskhe-Javakheti	Samtskhe-Javakheti	12.7622
536	Uraveli	Akhaltsikhe	3	8	Dec	Samtskhe-Javakheti	Samtskhe-Javakheti	12.7622
537	Uraveli	Akhaltsikhe	3	15	Sep	Samtskhe-Javakheti	Samtskhe-Javakheti	12.7622
538	Uraveli	Akhaltsikhe	3	4	Aug	Samtskhe-Javakheti	Samtskhe-Javakheti	12.7622
539	Uraveli	Akhaltsikhe	3	12	Sep	Samtskhe-Javakheti	Samtskhe-Javakheti	12.7622
540	Uraveli	Akhaltsikhe	3	18	Dec	Samtskhe-Javakheti	Samtskhe-Javakheti	12.7622
541	Uraveli	Akhaltsikhe	3	8	UK	Samtskhe-Javakheti	Samtskhe-Javakheti	12.7622
542	Uraveli	Akhaltsikhe	3	4	UK	Samtskhe-Javakheti	Samtskhe-Javakheti	12.7622
543	Uraveli	Akhaltsikhe	1	1	Sep	Samtskhe-Javakheti	Samtskhe-Javakheti	12.7622
544	Ushapati	Ushapati	3	4	Apr	Samegrelo-Zemo Svaneti	Samegrelo-Zemo Svaneti	0
545	Ushapati	Ushapati	3	3	Feb	Samegrelo-Zemo Svaneti	Samegrelo-Zemo Svaneti	0
546	Ushapati	Ushapati	3	2	Sep	Samegrelo-Zemo Svaneti	Samegrelo-Zemo Svaneti	0
547	Ushapati	Ushapati	3	2	Dec	Samegrelo-Zemo Svaneti	Samegrelo-Zemo Svaneti	0
548	Ushapati	Ushapati	3	2	Oct	Samegrelo-Zemo Svaneti	Samegrelo-Zemo Svaneti	0
549	Ushapati	Ushapati	3	1	Dec	Samegrelo-Zemo Svaneti	Samegrelo-Zemo Svaneti	0
550	Vachian	Akhalkalaki	1	2	Feb	Samtskhe-Javakheti	Samtskhe-Javakheti	6.73605
551	Vachian	Akhalkalaki	1	2	July	Samtskhe-Javakheti	Samtskhe-Javakheti	6.73605
552	Vachian	Akhalkalaki	1	2	June	Samtskhe-Javakheti	Samtskhe-Javakheti	6.73605
553	Vachian	Akhalkalaki	1	1	May	Samtskhe-Javakheti	Samtskhe-Javakheti	6.73605
554	Vachian	Akhalkalaki	1	2	July	Samtskhe-Javakheti	Samtskhe-Javakheti	6.73605
555	Vachian	Akhalkalaki	1	2	Aug	Samtskhe-Javakheti	Samtskhe-Javakheti	6.73605
556	Vachian	Vachian	2	2	Jan	Samtskhe-Javakheti	Samtskhe-Javakheti	0
557	Vakiri	Anaga	4	2	Aug	Kakheti	Kakheti	3.53385
558	Vakiri	Tsnori	1	2	UK	Kakheti	Kakheti	4.61263
559	Vardigeni	Rveli	4	1	May	Samtskhe-Javakheti	Samtskhe-Javakheti	7.04552
560	Vardisubani	Telavi	3	2	Feb	Kakheti	Kakheti	3.46863
561	Vardisubani	Telavi	3	2	Apr	Kakheti	Kakheti	3.46863
562	Vardisubani	Vanta	3	3	March	Kakheti	Kakheti	13.9739
563	Variani	Variani	2	2	March	Shida Kartli	Shida Kartli	0
564	Variani	Variani	2	2	Dec	Shida Kartli	Shida Kartli	0
565	Vazisubani	Vazisubani	3	1	Feb	Kakheti	Kakheti	0
566	Vazisubani	Vazisubani	1	1	Jan	Kakheti	Kakheti	0
567	Vazisubani	Vazisubani	3	1	March	Kakheti	Kakheti	0
568	Vazisubani	Vazisubani	1	1	Feb	Kakheti	Kakheti	0
569	Velistsikhe	Gurjaani	1	2	Feb	Kakheti	Kakheti	9.28794
570	Velistsikhe	Kalauri	3	1	March	Kakheti	Kakheti	7.96075
571	Velistsikhe	Shashiani	2	3	March	Kakheti	Kakheti	6.65263
572	Velistsikhe	Shashiani	3	1	March	Kakheti	Kakheti	6.65263
573	Velistsikhe	Vazisubani	3	1	Feb	Kakheti	Kakheti	5.53751
574	Velistsikhe	Velistsikhe	3	4	July	Kakheti	Kakheti	0
575	Velistsikhe	Velistsikhe	3	1	Jan	Kakheti	Kakheti	0
576	Zana	Zana	3	3	Dec	Samegrelo-Zemo Svaneti	Samegrelo-Zemo Svaneti	0
577	Zemo_Bodbe	Tsnori	1	1	Sep	Kakheti	Kakheti	5.86621
578	Zemo_Bodbe	Zemo_Bodbe	1	4	Jan	Kakheti	Kakheti	0
579	Zemo_Khandaki	Kvibisi	2	1	March	Shida Kartli	Samtskhe-Javakheti	73.4078
580	Zemo_Ksovrisi	Gori	3	9	Feb	Shida Kartli	Shida Kartli	7.95867
581	Zemo_Ksovrisi	Gori	3	6	Jan	Shida Kartli	Shida Kartli	7.95867
582	Zemo_Ksovrisi	Gori	1	2	Nov	Shida Kartli	Shida Kartli	7.95867
583	Zemo_Ksovrisi	Khobisi	3	6	May	Shida Kartli	Shida Kartli	12.0438
584	Zemo_Nashovari	Lagodekhi	3	4	Aug	Samegrelo-Zemo Svaneti	Kakheti	328.425
585	Zemo_Nashovari	Zemo_Nashovari	3	2	Feb	Samegrelo-Zemo Svaneti	Samegrelo-Zemo Svaneti	0
586	Zemo_Nashovari	Zemo_Nashovari	1	1	March	Samegrelo-Zemo Svaneti	Samegrelo-Zemo Svaneti	0
587	Zana	Zana	3	5	June	Samegrelo-Zemo Svaneti	Samegrelo-Zemo Svaneti	0
588	Zerti	Mejvriskhevi	1	2	Nov	Shida Kartli	Shida Kartli	2.92693
589	Zerti	Zerti	3	10	Jan	Shida Kartli	Shida Kartli	0
590	Zerti	Zerti	3	20	Feb	Shida Kartli	Shida Kartli	0
591	Zikiloa	Akhaldaba	1	1	March	Samtskhe-Javakheti	Samtskhe-Javakheti	41.0414
592	Zikiloa	Akhaldaba	2	1	June	Samtskhe-Javakheti	Samtskhe-Javakheti	41.0414
593	Zugdidi	Akhalsopeli	2	1	Dec	Samegrelo-Zemo Svaneti	Shida Kartli	200.857
594	Zugdidi	Akhalsopeli	1	2	Feb	Samegrelo-Zemo Svaneti	Shida Kartli	200.857
595	Zugdidi	Akhalsopeli	4	1	Feb	Samegrelo-Zemo Svaneti	Shida Kartli	200.857
596	Zugdidi	Akhalsopeli	1	1	March	Samegrelo-Zemo Svaneti	Shida Kartli	200.857
597	Zugdidi	Orsantia	1	2	March	Samegrelo-Zemo Svaneti	Samegrelo-Zemo Svaneti	16.8653
598	Zugdidi	Orsantia	2	2	Sep	Samegrelo-Zemo Svaneti	Samegrelo-Zemo Svaneti	16.8653
599	Zugdidi	Teklati	3	2	May	Samegrelo-Zemo Svaneti	Samegrelo-Zemo Svaneti	30.7948

## Sheet: Data_dictionary
Each row represents an individual transaction.
origin	Village of origin of the shipment
destination	Village of destination of the shipment
pigtype	Type of pig shipped: 1= Replacement sows, 2= Boar, 3= Pigglets, 4= Ready-to-slaughter pigs
Npigs	Total number of pigs shipped
month	Month of the year when the shipment occurred
Regorigin	Region of origin of the shipment
Regdestination	Region of destination of the shipment
dist	Euclidean distance from village of origin to village of destination
